# Supplementary material for: deconstructSigs: delineating mutational processes in single tumors distinguishes DNA repair deficiencies and patterns of carcinoma evolution
Source: PubMed Central journal article supplement (PMC4762164; doi:10.1186/s13059-016-0893-4), 2016-02-22
Supplement: 13059_2016_893_MOESM5_ESM.pdf [file 13059_2016_893_MOESM5_ESM.pdf]

BRCA comparison

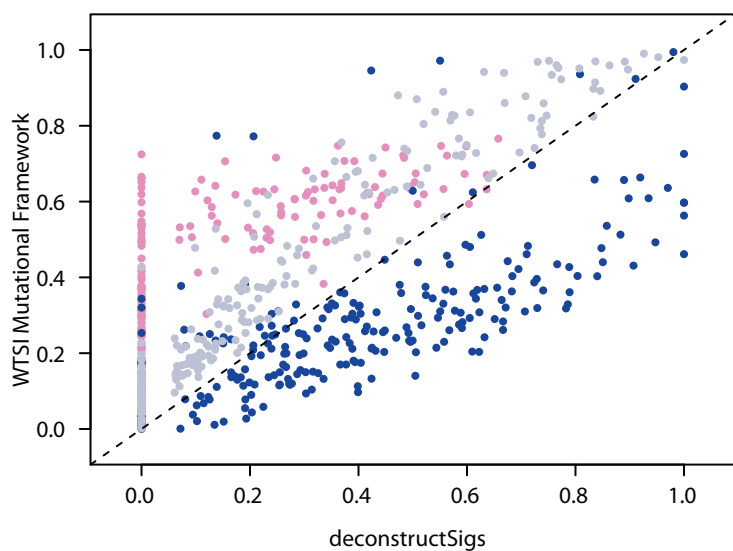

HNSC comparison

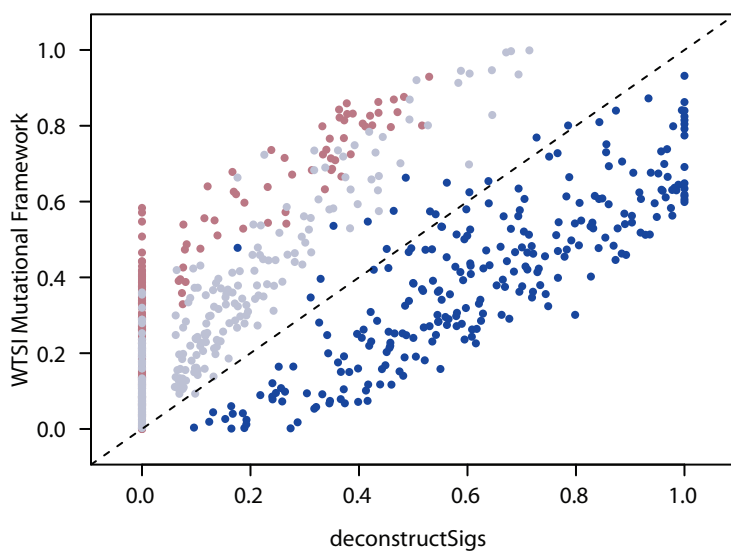

LUAD comparison

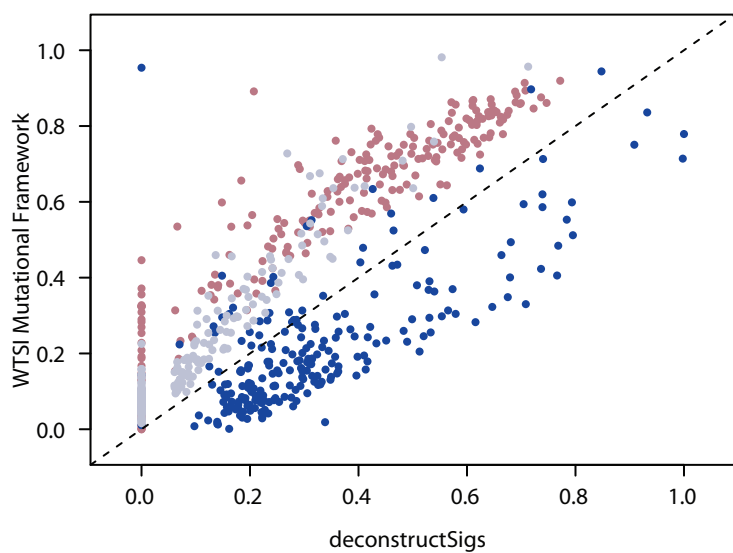

LUSC comparison

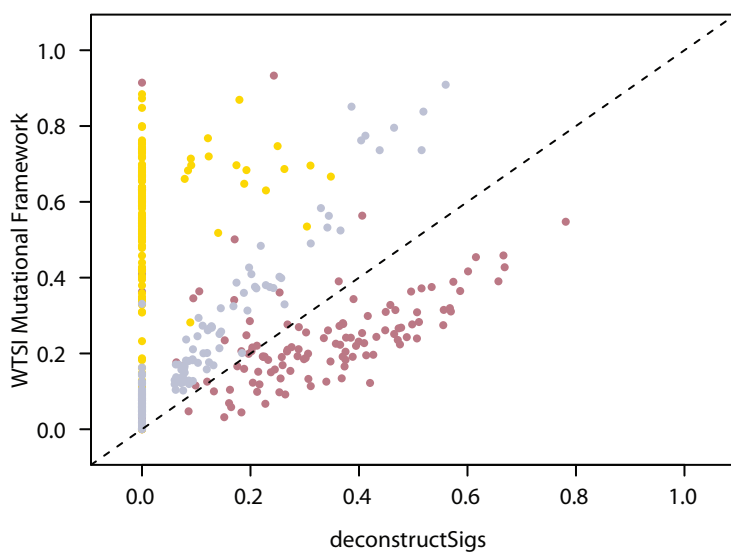

- age
- APOBEC
- Signature.3
- Signature.4
- Signature.5
